# Supplementary material for: Is a Water Content of 60% Maximum Water Holding Capacity Suitable for Folsomia candida Reproduction Tests? A Study with Silver Nanoparticles and AgNO3
Source: MDPI journal article supplement (doi:10.3390/ijerph15040652), 2018-04-01
Supplement: s1 [file s1]

## Supplementary Materials

### Reproduction in the controls

a)

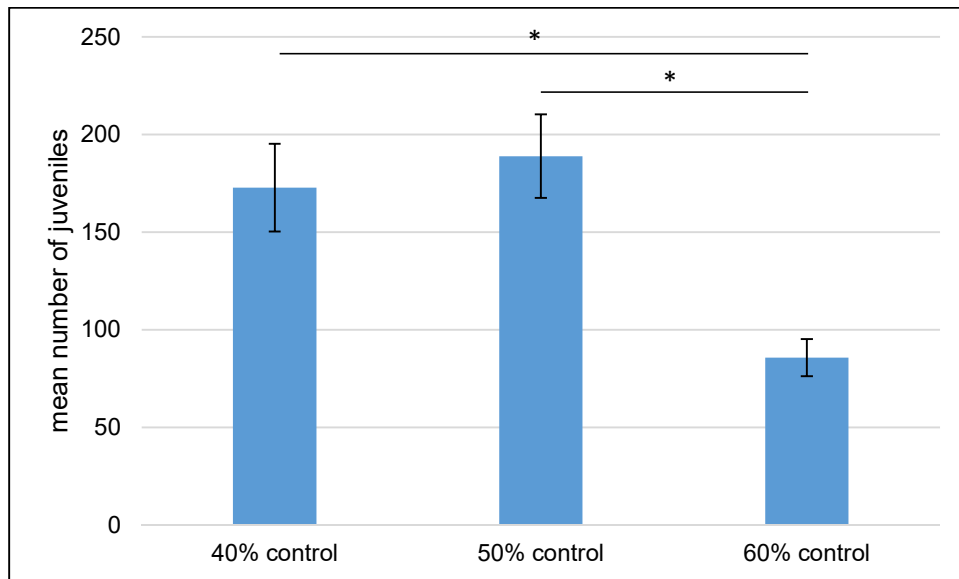

b)

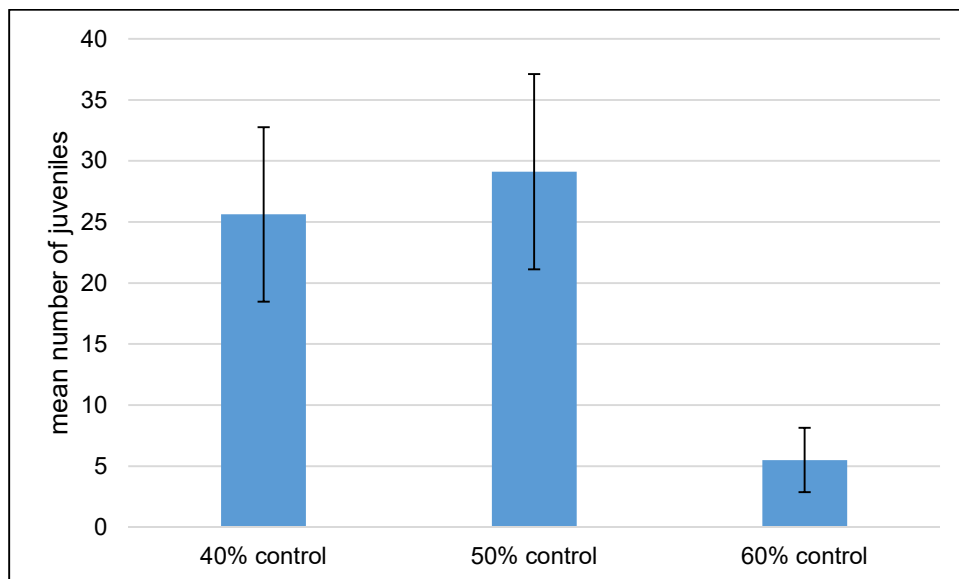

Figure S1: Reproduction in the controls with 40%, 50% and 60% maximum water holding capacity (WHC). *F. candida* reproduction in the control treatments with different water contents in two independent repetitions (a, b) in OECD soil (see Figure 4 for third repeat). Shown is the mean number of juveniles after a 28-day reproduction test. Asterisks indicate significant statistical differences between the respective controls (Kruskal-Wallis, post-hoc Dunn test,  $p > 0.05$ ). Mean  $\pm$  SE,  $n = 8$ .
